# Supplementary material
Source: Springer Nature journal article supplement (https://www.springermedizin.de/resource/supplementary/13002_2009_182_MOESM1_ESM.pdf/9627402)

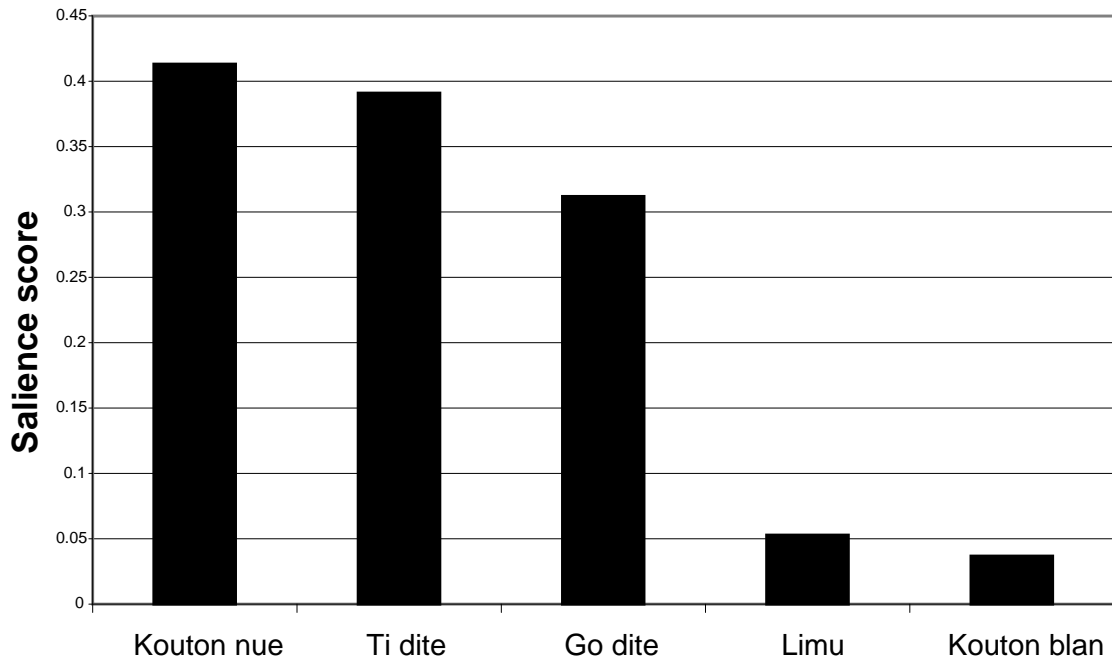

Supplement: MOESM1 [file 9627402]
